# Supplementary material
Source: PubMed Central journal article supplement (PMC3777408)

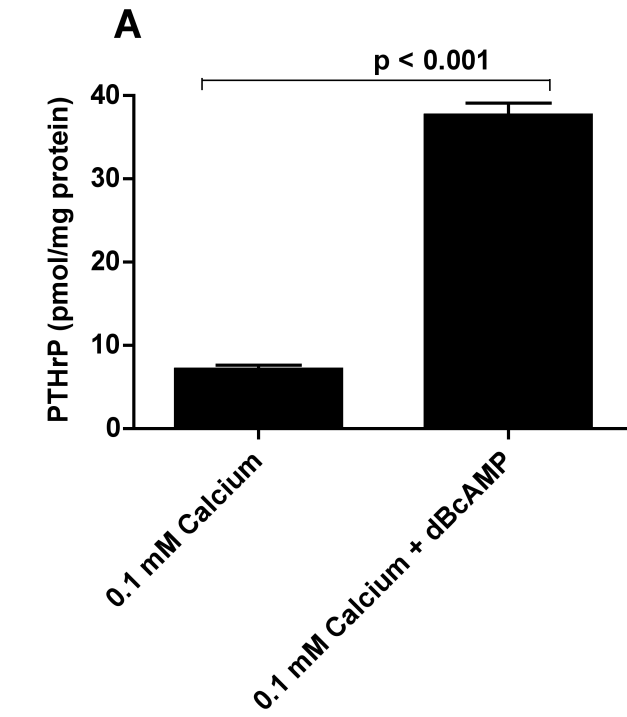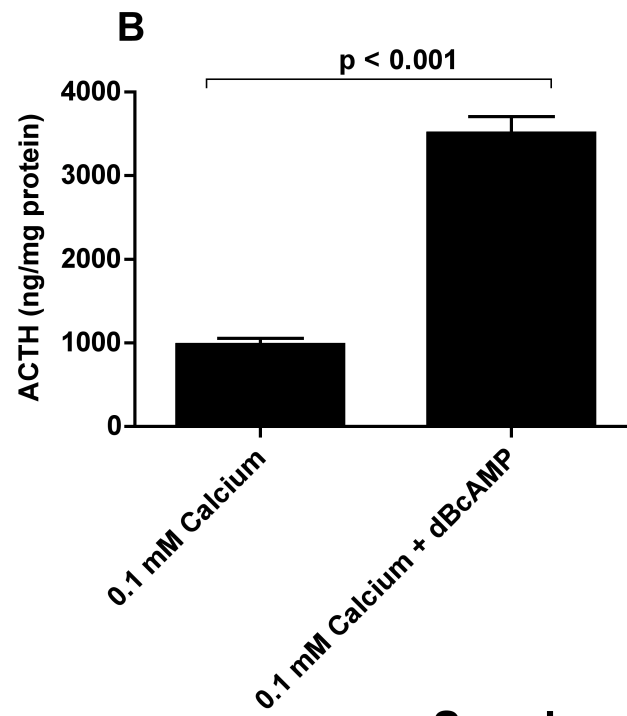

Supplemental Figure 1

Supplement: NIHMS512283-supplement-Sup_fig_1.pdf [file NIHMS512283-supplement-Sup_fig_1.pdf]

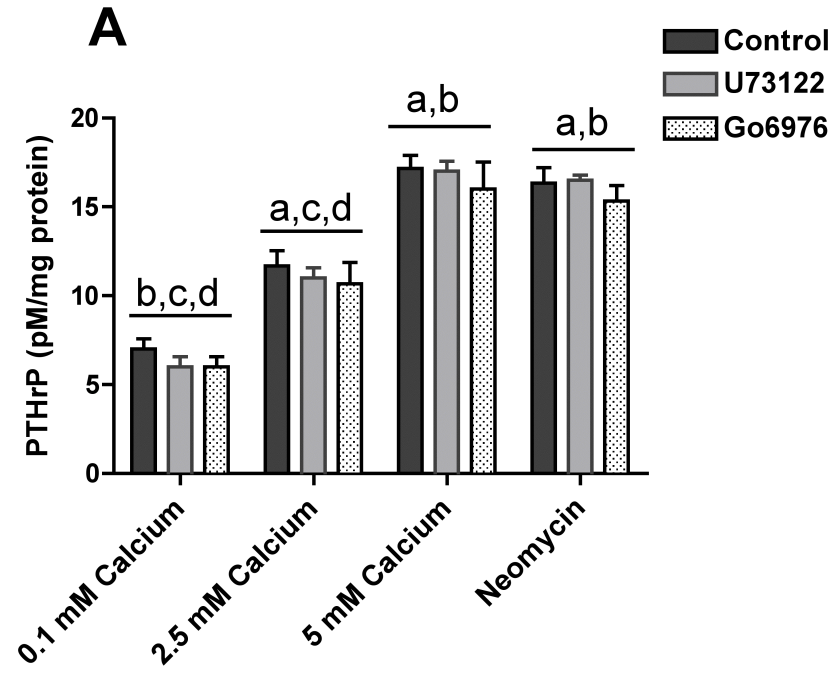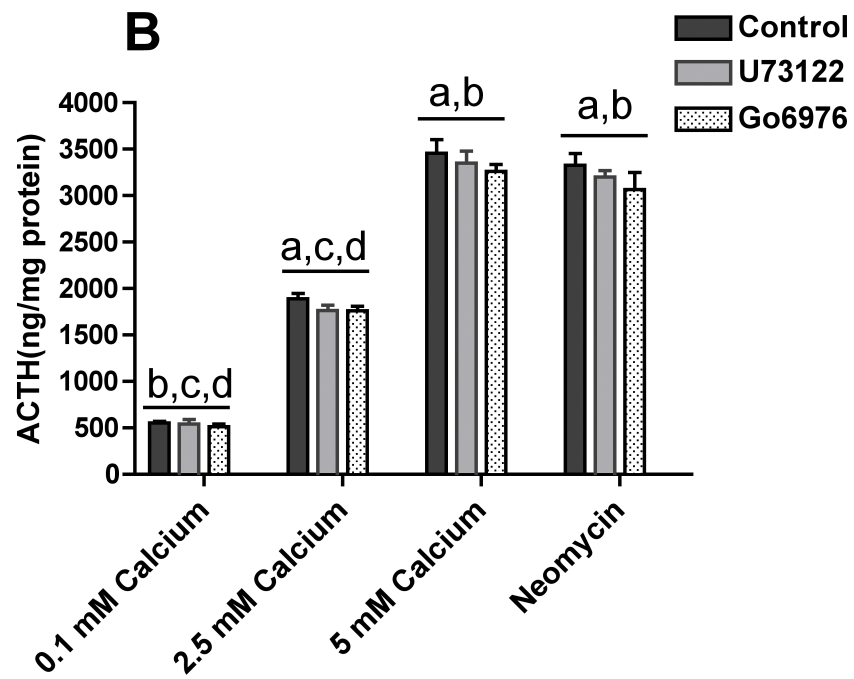

Supplemental Figure 2

Supplement: NIHMS512283-supplement-Sup_fig_2.pdf [file NIHMS512283-supplement-Sup_fig_2.pdf]

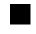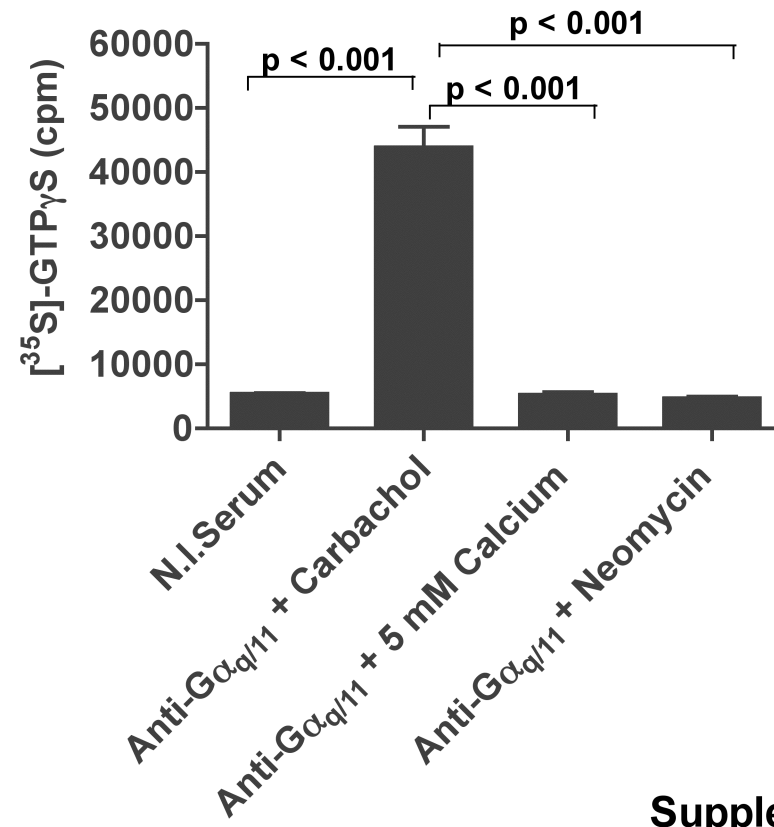

Supplemental Figure 3

Supplement: NIHMS512283-supplement-Sup_fig_3.pdf [file NIHMS512283-supplement-Sup_fig_3.pdf]
